# Supplementary material for: The UKC3 regional coupled environmental prediction system
Source: Copernicus journal article supplement (doi:10.5194/gmd-12-2357-2019), 2019-06-18
Supplement: Supplementary file 1 [file gmd-12-2357-2019-supplement.zip]

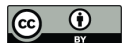

## *Supplement of*

# **The UKC3 regional coupled environmental prediction system**

**Huw W. Lewis et al.**

*Correspondence to:* Huw W. Lewis ([huw.lewis@metoffice.gov.uk](mailto:huw.lewis@metoffice.gov.uk))

- [gmd-12-2357-2019-supplement-title-page.pdf](#)
- [GMD\\_UKC3\\_Supplementary\\_firstSubmit\\_Sep2018.pdf](#)
- [gmd-2018-245-ukc3-namelists.txt](#)

The copyright of individual parts of the supplement might differ from the CC BY 4.0 License.
